# Supplementary material
Source: publisher site journal article supplement (https://www.dovepress.com/article/340116)
Supplement: Supplementary file 1 [file get_supplementary_file.php]

**Table S1**. Resistance patterns, groups and periods of isolation of multi-resistant *Salmonella*

| Resistance pattern | No. of isolates | *Salmonella* group/species | Period of isolation a |
| --- | --- | --- | --- |
| Chl,Cip, TGC | 6 | B, C, D | A, B, D, E |
| TS, Cip, TGC | 8 | B, C, D, E | A, B, C, D |
| Amp, Cip, TGC | 16 | B, C, D, E | A, b, D, E |
| Chl, Amp, Cip | 11 | B, D, Typhi | A, B |
| Amp, TS, TGC | 5 | B, D | A, B, C, D |
| Chl, TS, TGC | 2 | B | A |
| Amp, Gn, Cip | 2 | D | D |
| Gn, Cip, TGC | 2 | C | B, E |
| Amp, Gn, TGC | 1 | C | A |
| TS, Gn, Cip, TGC | 1 | C | B |
| Chl, TS, Gn, Cip | 1 | D | C |
| Chl, Amp, CT, Cip | 2 | D | E |
| Amp, TS, Gn, TGC | 2 | B, D | A, C |
| Amp, CT, Cip, TGC | 2 | D | D |
| Amp, TS, Cip, TGC | 6 | B, C, D | A, B, C |
| Chl, Amp, TS, TGC | 5 | B | A, E |
| Chl, Amp, Cip, TGC | 4 | B, C, Paratyphi B | A, B, C |
| Chl, Amp, TS, Cip | 10 | D, Typhi | A, B, E |
| Amp, Gn, Cip, TGC | 15 | B, C, D, Miscellaneous b | A, B, C, D, E |
| Amp, TS, Gn, Cip, TGC | 4 | B, C, D, Miscellaneous c | A, D |
| Chl, Amp, TS, Gn, TGC | 3 | C, D | B, D |
| Chl, TS, Gn, Cip, TGC | 3 | C | B |
| Chl, Amp, Gn, Cip, TGC | 2 | C | B |
| Chl, Amp, TS, Cip, TGC | 1 | D | D |
| Amp, Gn, CT, Cip, TGC | 1 | D | D |
| Chl, Amp, TS, Gn, Cip, TGC | 3 | C, D | A |
| Chl, Amp, TS, Gn, CT, TGC | 1 | C | D |

Abbreviations:Chl, chloramphenicol; Amp, ampicillin; Cip, ciprofloxacin; TGC, tigecycline; TS, trimethoprim/sulfamethoxazole; Gn, gentamicin

a A: 2006-2008, B: 2009-2011, C: 2012-2014, D: 2015-2017, E: 2018-2020

bMiscellaneous group includes groups A, F, and J

c Miscellaneous group includes groups A and H
